# Supplementary material
Source: PubMed Central journal article supplement (PMC3483644)
Supplement: NIHMS412500-supplement-1_si_001.pdf [file NIHMS412500-supplement-1_si_001.pdf]

## Synthesis of Binucleating Macrocycles and their Nickel(II) Hydroxo- and Cyano-Bridged Complexes with Divalent Ions: Anatomical Variation of Ligand Features

Xiaofeng Zhang<sup>§</sup>, Deguang Huang<sup>§</sup>, Yu-Sheng Chen<sup>†</sup>, and R. H. Holm<sup>§\*</sup>

<sup>§</sup>Department of Chemistry and Chemical Biology, Harvard University, Cambridge, Massachusetts 02138, United States

<sup>†</sup>Center for Advanced Radiation Source, University of Chicago c/o APS/ANL, Bldg. 434 D, Argonne, IL 60439, United States

\*To whom correspondence should be addressed. E-mail: [holm@chemistry.harvard.edu](mailto:holm@chemistry.harvard.edu)

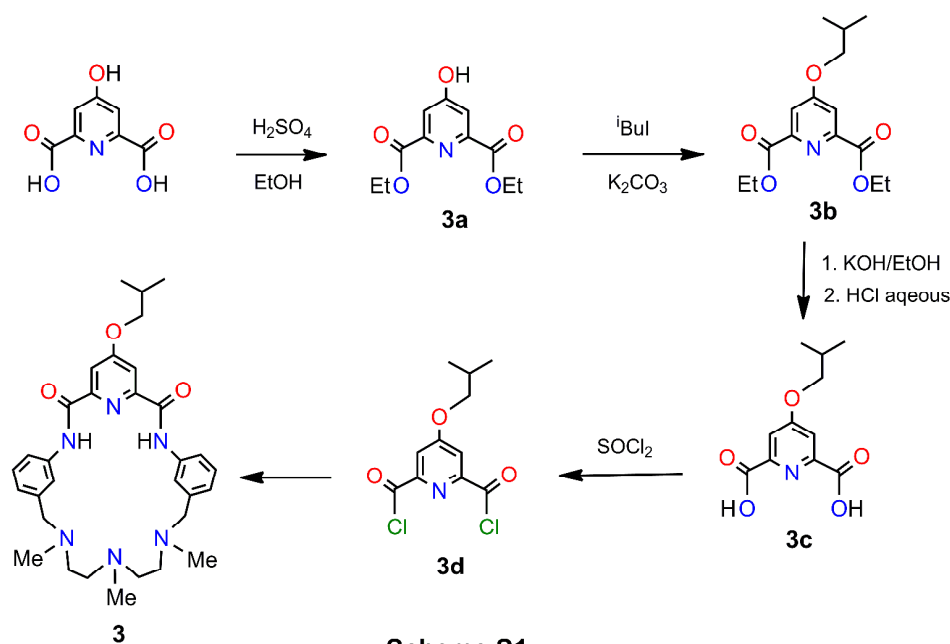

**Intermediate (3a).** Chelidamic acid (2.0g, 11 mmol) and concentrated sulfuric acid ( $\text{H}_2\text{SO}_4$ , 20 drops) in ethanol (75 mL) were refluxed at  $80^\circ\text{C}$  for 4 h. The solvent was removed in vacuo to leave some white oily residue. Water (30 mL) and ethyl acetate (100 mL) were added to extract the product in organic layer and the aqueous layer was washed with ethyl acetate ( $2 \times 100$  mL). The combined organic layers were dried over anhydrous  $\text{Na}_2\text{SO}_4$ , filtered and solvent removed to give **3a** as a white powder (2.37 g, 90%).  $^1\text{H}$  NMR ( $\text{CDCl}_3$ ):  $\delta$  7.76 (s, 2), 4.45 (q, 4), 3.38 (d, 2), 2.13 (m, 1), 1.45 (t, 6), 1.06 (d, 6).

**Intermediate (3b).** To a solution of **3a** (2.19 g, 9.15 mmol, 1 equiv) in DMF (45 mL) was added K<sub>2</sub>CO<sub>3</sub> (3.79 g, 27.45 mmol, 3 equiv) under a nitrogen atmosphere. The reaction mixture was stirred at 120°C for 1.5 h and cooled down to 70°C. *t*-BuI (1.59 mL, 13.73 mmol, 1.5 equiv) was added and the reaction mixture was stirred at 70°C for 3 h. After that, the mixture was cooled down to room temperature and the volume of solution was reduced to *ca.* 5 mL. The residue was diluted with 50 mL of toluene and 20 mL of H<sub>2</sub>O. The aqueous layer was extracted with toluene (3 × 50 mL). The organic layers were combined and washed with H<sub>2</sub>O (2 × 50 mL), dried with anhydrous Na<sub>2</sub>SO<sub>4</sub>. Solvent was removed to give **3b** as a light yellow oil (1.82 g, 67%). <sup>1</sup>H NMR (DMSO-*d*<sub>6</sub>): δ 7.57 (s, 2), 4.35 (q, 4), 1.32 (t, 6).

**Intermediate (3c).** A solution of KOH (1.38 g, 24.6 mmol) in ethanol (15 mL) was added to **3b** (1.8 g, 6.1 mmol) in ethanol (30 mL). The mixture was stirred at room temperature for 2 h. Solvent was removed and the white residue was dissolved in 50 mL of H<sub>2</sub>O. The aqueous solution was washed with ether (2×50 mL), acidified pH to *ca.* 2.0 with 10% of HCl. The precipitate was collected and dried in vacuo to give **3c** as a white powder (1.38 g, 95%). <sup>1</sup>H NMR (DMSO-*d*<sub>6</sub>): δ 7.65 (s, 2), 4.01 (d, 2), 2.04 (m, 1), 0.98 (d, 6).

**Intermediate (3d).** Compound **3c** (1.35g, 5.64 mmol), thionyl chloride (15 mL), and anhydrous DMF (15 drops) were mixed and stirred for 5 h at 75°C under N<sub>2</sub> atmosphere. The crude product after removing of excess thionyl chloride was treated with dry THF and solvent removed in vacuo to leave **3d** as a white solid (1.26 g, 81%).

**Macrocyclic ligand (3).** To a solution of Et<sub>3</sub>N (14 mL) in THF (350 mL) was added simultaneously solution of 3,3'-dien<sup>Me<sub>3</sub></sup>-dianiline (1.62 g, 4.56 mmol, the compound **12** in literature<sup>1</sup>) and **3d** (1.26g, 4.56 mmol), each in THF (50 mL), by syringe pump over 24 h. The reaction mixture was stirred for 3 h and filtered. The filtrate was evaporated to leave a yellow sticky solid. The residue was stirred in CH<sub>3</sub>CN (250 mL) overnight and filtered. Solvent was removed to leave crude product as some light yellow solid, which was purified on a silica column eluted with CH<sub>2</sub>Cl<sub>2</sub>/MeOH/NH<sub>4</sub>OH to give **3** as a white solid (0.90, 35%). <sup>1</sup>H NMR (DMSO-*d*<sub>6</sub>): δ 1.02 (d, 6) 2.11(s, 6), 2.28 (s, 3), 2.54 (t, 4), 2.63 (t, 4), 3.50 (s, 4), 4.03(d, 2), 7.01 (d, 2), 7.33 (t, 2), 7.63 (s, 2), 7.83 (s, 2), 8.37 (d, 2), 11.16 (s, 2). *m/z* (ES) 559 [M+H]<sup>+</sup>.

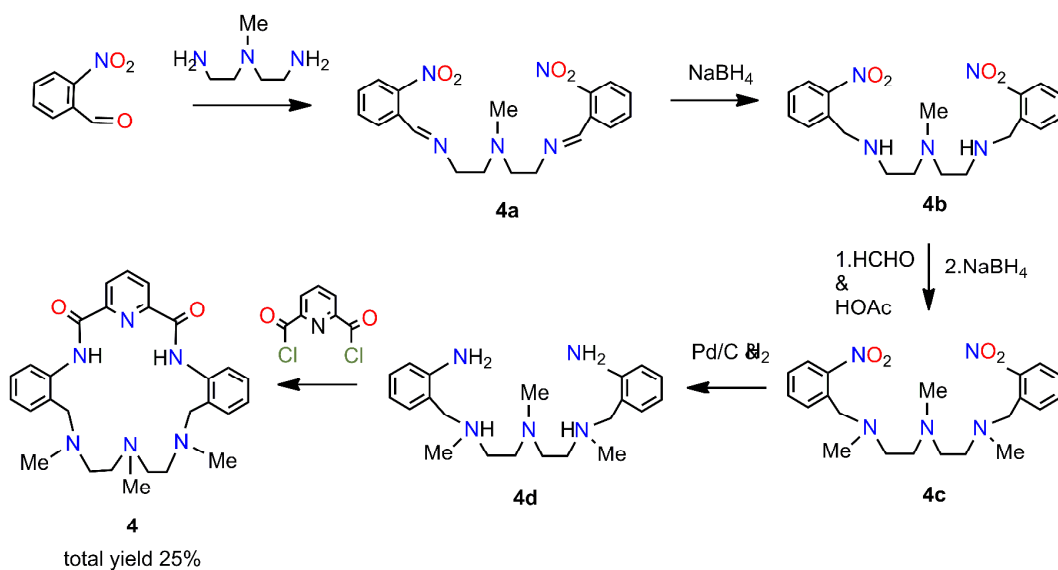

**Intermediate (4a).** 2-Nitrobenzaldehyde (7.56 g, 50 mmol) and 3-*N*-methylaminopentane-1,5-diamine (2.93 g, 25 mmol) were reacted in ethanol (150 mL) for 24 h. The orange solution was pumped to leave product as some orange-red oil (9.58 g, 100%). <sup>1</sup>H NMR (CDCl<sub>3</sub>): δ 2.39 (s, 3), 2.82 (t, 4), 3.79 (t, 4), 7.49 (t, 2), 7.58 (t, 2), 7.92 (d, 2), 7.97 (d, 2), 8.64 (s, 2).

**Intermediate (4b).** NaBH<sub>4</sub> (3.78 g, 100 mmol) was added slowly to a solution of **4a** (9.58 g, 25.0 mmol) in methanol (160 mL) at 50°C and stirred for 2h. The solution was cooled to room temperature, solvent was removed, and the orange solid was extracted with dichloromethane/water (200 mL/120 mL). The organic layer was washed with saturated NaCl aqueous solution (4 × 80 mL), dried over MgSO<sub>4</sub>, and filtered. Removal of solvent gave product as a yellow-orange oil (8.96 g, 92.5%). <sup>1</sup>H NMR (CDCl<sub>3</sub>): δ 2.05 (s, br, 2), 2.15 (s, 3), 2.48 (t, 4), 2.68 (t, 4), 4.02 (s, 4), 7.36 (t, 2), 7.53 (t, 2), 7.61 (d, 2), 7.89 (d, 2).

**Intermediate (4c).** To a solution of **4b** (8.96 g, 23.1 mmol) in acetonitrile (600 mL) and acetic acid (70 mL) was added an aqueous solution of formaldehyde (35 mL, 37%). The mixture was stirred for 1 h, cooled to 0°C, and NaBH<sub>4</sub> (4.37 g, 115.5 mmol) was slowly added. Stirring was continued for 2 h and for 40 h at room temperature. After filtration, solvent was removed from the filtrate to give a light yellow oily residue, which was stirred in dichloromethane (200 mL). A solution of 2 M NaOH was added until pH was *ca.* 14. The aqueous layer was extracted with dichloromethane (2 × 50 mL) and the combined organic layers were washed with saturated NaCl aqueous solution (2 × 100 mL), dried over MgSO<sub>4</sub> and filtered. Removal of solvent from the filtrate gave product as a light yellow-orange oil (9.00 g, 94%). <sup>1</sup>H NMR (CDCl<sub>3</sub>): δ 2.16 (s, 6), 2.18 (s, 3), 2.46 (s, 8), 3.77 (s, 4), 7.34 (t, 2), 7.50 (t, 2), 7.63 (d, 2), 7.78 (s, 2).

**Intermediate (4d).** A mixture of **4c** (2.49 g, 6.0 mmol) and Pd/C (90 mg) in anhydrous ethanol was attached a H<sub>2</sub> balloon under dihydrogen atmosphere. The mixture was stirred vigorously for 6 h at room temperature and filtered. Volume reduction of the filtrate gave a light orange oil. The crude product was purified in the air on a silica column eluted with dichloromethane/methanol/NH<sub>4</sub>OH to give a yellow oil (1.55 g, 73%). <sup>1</sup>H NMR (CDCl<sub>3</sub>): δ 2.17 (s, 6), 2.21 (s, 3), 2.51 (m, 8), 3.47 (s, 4), 4.79 (s, br, 4), 6.61 (d, 2), 6.67 (t, 4), 6.98 (d, 2), 7.10 (t, 2).

**Macrocyclic ligand (4).** To a solution of Et<sub>3</sub>N (12 mL) in THF (350 mL) was added simultaneously solutions of **4d** (1.55 g, 4.37 mmol) and pyridine-2,6-dicarbonylchloride (1.03 g, 5.03 mmol), each in THF (50 mL), by syringe pump over 24 h. The reaction mixture was stirred for 2 h, filtered, and the filtrate was evaporated to leave a oily yellow solid. This residue was stirred with acetonitrile (150 mL, 3 h) and the solution was filtered. Solvent of filtrate was removed and the crude product was purified on a silica column eluted with dichloromethane/methanol/NH<sub>4</sub>OH to afford product as a white solid (0.85 g, 40%). <sup>1</sup>H NMR (CDCl<sub>3</sub>): δ 1.59 (s, 3), 2.19 (s, 6), 2.29 (s, 8), 3.35 (s, 4), 7.09 (m, 4), 7.34 (t, 2), 7.94 (d, 2), 8.02 (t, 1), 8.32 (d, 2), 11.23 (s, 2). *Anal.* Calcd. for C<sub>28</sub>H<sub>34</sub>N<sub>6</sub>O<sub>2</sub>: C, 69.11; H, 7.04; N, 17.27. Found: C, 69.25; H, 6.97; N, 17.18.

-----

**Anomalous Scattering.**<sup>2-3</sup> Crystals suitable for X-ray diffraction were mounted on glass fibers affixed to a copper pin for each. Data were collected at ChemMatCARS at the Advanced Photon Source at Argonne National Laboratory (CAR Center for Advanced Radiation Sources). The data set was collected at 95 K using a diamond (111) crystal monochromator and a Bruker CCD detector. The incident X-ray wavelengths used were following: the Cu edge:  $1.38082 \times 10^{-10}$  m, the Ni edge:  $1.48787 \times 10^{-10}$  m, the Fe edge:  $1.74331 \times 10^{-10}$  m. The diffraction data for overall structure determination were collected on a Bruker CCD area detector at  $0.71073 \times 10^{-10}$  m (100 K). All the structures were solved using the SHELX program package.<sup>4</sup>

## References

1. Huang, D; Holm, R. H. *J. Am. Chem. Soc.* **2010**, *132*, 4693-4701.
2. Coppens, P. *Synchrotron Radiation Crystallography*; Academic Press Limited: London, **1992**.
3. Wu, G.; Zhang, Y.; Ribaud, L.; Coppens, P. *Inorg. Chem.* **1998**, *37*, 6078-6083.
4. Sheldrick, G. M. *Acta Crystallogr.* **2008**, *A64*, 112-122.

**Table S1.** Crystallographic Data<sup>a</sup> for Compounds **4-8**.

| compounds                                                                                                      | [4]                                                           | [5]·HOTf·MeCN                                                                               | [6]·2H <sub>2</sub> O<br>·0.5EtOAc                            | (Et <sub>4</sub> N)[7]                                          | (Et <sub>4</sub> N)[8]                                          |
|----------------------------------------------------------------------------------------------------------------|---------------------------------------------------------------|---------------------------------------------------------------------------------------------|---------------------------------------------------------------|-----------------------------------------------------------------|-----------------------------------------------------------------|
| formula                                                                                                        | C <sub>28</sub> H <sub>34</sub> N <sub>6</sub> O <sub>2</sub> | C <sub>33</sub> H <sub>40</sub> F <sub>3</sub> N <sub>7</sub> O <sub>5</sub> S <sub>2</sub> | C <sub>35</sub> H <sub>51</sub> N <sub>7</sub> O <sub>5</sub> | C <sub>31</sub> H <sub>42</sub> N <sub>4</sub> CuO <sub>3</sub> | C <sub>32</sub> H <sub>42</sub> N <sub>4</sub> CuO <sub>5</sub> |
| <i>M</i>                                                                                                       | 486.61                                                        | 735.83                                                                                      | 649.83                                                        | 582.23                                                          | 626.24                                                          |
| crystal system                                                                                                 | triclinic                                                     | orthorhombic                                                                                | monoclinic                                                    | orthorhombic                                                    | monoclinic                                                      |
| space group                                                                                                    | <i>P</i> -1                                                   | <i>Pna</i> 2(1)                                                                             | <i>C</i> 2/ <i>c</i>                                          | <i>Cmc</i> 2(1)                                                 | <i>P</i> 2(1)/ <i>n</i>                                         |
| <i>a</i> , Å                                                                                                   | 11.0491(5)                                                    | 16.7365(19)                                                                                 | 15.9011(10)                                                   | 14.6152(12)                                                     | 11.8393(15)                                                     |
| <i>b</i> , Å                                                                                                   | 11.2919(5)                                                    | 12.7588(15)                                                                                 | 19.9913(12)                                                   | 14.0240(11)                                                     | 17.340(2)                                                       |
| <i>c</i> , Å                                                                                                   | 11.6718(5)                                                    | 32.639(4)                                                                                   | 21.7382(14)                                                   | 14.7774(12)                                                     | 15.206(2)                                                       |
| $\alpha$ , deg                                                                                                 | 65.896(2)                                                     | 90                                                                                          | 90                                                            | 90                                                              | 90                                                              |
| $\beta$ , deg                                                                                                  | 70.060(2)                                                     | 90                                                                                          | 95.5310(10)                                                   | 90                                                              | 93.708(5)                                                       |
| $\gamma$ , deg                                                                                                 | 76.715(2)                                                     | 90                                                                                          | 90                                                            | 90                                                              | 90                                                              |
| <i>V</i> , Å <sup>3</sup>                                                                                      | 1242.60(9)                                                    | 6969.7(14)                                                                                  | 6878.0(7)                                                     | 3028.8(4)                                                       | 3115.2(7)                                                       |
| <i>Z</i>                                                                                                       | 2                                                             | 8                                                                                           | 8                                                             | 4                                                               | 4                                                               |
| $\mu$ , mm <sup>-1</sup>                                                                                       | 0.085                                                         | 0.221                                                                                       | 0.085                                                         | 0.758                                                           | 0.747                                                           |
| independent data                                                                                               | 4851                                                          | 11873                                                                                       | 6550                                                          | 3755                                                            | 5636                                                            |
| refined parameters                                                                                             | 325                                                           | 1129                                                                                        | 552                                                           | 208                                                             | 416                                                             |
| <i>R</i> <sub>1</sub> <sup>b</sup> , <i>wR</i> <sub>2</sub> <sup>c</sup> ( <i>I</i> > 2 $\sigma$ ( <i>I</i> )) | 0.0378, 0.0954                                                | 0.0653, 0.1407                                                                              | 0.0588, 0.1508                                                | 0.0391, 0.1057                                                  | 0.0472, 0.1152                                                  |
| <i>R</i> <sub>1</sub> , <i>wR</i> <sub>2</sub> (all data)                                                      | 0.0442, 0.1002                                                | 0.1014, 0.1602                                                                              | 0.0737, 0.1639                                                | 0.0419, 0.1101                                                  | 0.0683, 0.1278                                                  |

<sup>a</sup>T = 100(2) K, Mo K $\alpha$  radiation ( $\lambda = 0.71073$  Å). <sup>b</sup>*R*<sub>1</sub> =  $\sum||F_o| - |F_c|| / \sum|F_o|$ . <sup>c</sup>*wR*<sub>2</sub> =  $\{\sum[w(F_o^2 - F_c^2)^2 / (F_o^2)^2]\}^{1/2}$ .

**Table S2.** Crystallographic Data<sup>a</sup> for Compounds **11, 14** and **16-18**.

| compounds                                                                                                      | (Et <sub>4</sub> N) <sub>2</sub> [11]                           | [14]                                                                | [16] <sup>b</sup>                                                   | (Me <sub>4</sub> N) [17]<br>· toluene                           | [18] · DMF                                                          |
|----------------------------------------------------------------------------------------------------------------|-----------------------------------------------------------------|---------------------------------------------------------------------|---------------------------------------------------------------------|-----------------------------------------------------------------|---------------------------------------------------------------------|
| formula                                                                                                        | C <sub>62</sub> H <sub>82</sub> N <sub>8</sub> CoO <sub>4</sub> | C <sub>28</sub> H <sub>33</sub> ClMnN <sub>6</sub> NiO <sub>3</sub> | C <sub>28</sub> H <sub>33</sub> ClCuN <sub>6</sub> NiO <sub>3</sub> | C <sub>43</sub> H <sub>61</sub> N <sub>7</sub> NiO <sub>4</sub> | C <sub>35</sub> H <sub>48</sub> ClCuN <sub>7</sub> NiO <sub>5</sub> |
| <i>M</i>                                                                                                       | 1062.29                                                         | 650.70                                                              | 659.30                                                              | 798.70                                                          | 804.50                                                              |
| crystal system                                                                                                 | orthorhombic                                                    | monoclinic                                                          | monoclinic                                                          | orthorhombic                                                    | monoclinic                                                          |
| space group                                                                                                    | <i>Pbcn</i>                                                     | <i>P</i> 2(1)/ <i>c</i>                                             | <i>P</i> 2(1)/ <i>c</i>                                             | <i>P</i> 2(1)2(1)2(1)                                           | <i>P</i> 2(1)/ <i>n</i>                                             |
| <i>a</i> , Å                                                                                                   | 12.7121(8)                                                      | 8.727(3)                                                            | 7.8719(16)                                                          | 12.2953(10)                                                     | 8.2255(5)                                                           |
| <i>b</i> , Å                                                                                                   | 28.3291(18)                                                     | 17.896(6)                                                           | 19.078(4)                                                           | 12.6618(10)                                                     | 24.8410(16)                                                         |
| <i>c</i> , Å                                                                                                   | 15.4425(9)                                                      | 17.134(5)                                                           | 17.542(4)                                                           | 26.974(2)                                                       | 18.1320(12)                                                         |
| $\alpha$ , deg                                                                                                 | 90                                                              | 90                                                                  | 90                                                                  | 90                                                              | 90                                                                  |
| $\beta$ , deg                                                                                                  | 90                                                              | 100.227(6)                                                          | 95.97(3)                                                            | 90                                                              | 102.2800(10)                                                        |
| $\gamma$ , deg                                                                                                 | 90                                                              | 90                                                                  | 90                                                                  | 90                                                              | 90                                                                  |
| <i>V</i> , Å <sup>3</sup>                                                                                      | 5561.2(6)                                                       | 2633.4(15)                                                          | 2620.1(9)                                                           | 4199.4(6)                                                       | 3620.1(4)                                                           |
| <i>Z</i>                                                                                                       | 4                                                               | 4                                                                   | 4                                                                   | 4                                                               | 4                                                                   |
| $\mu$ , mm <sup>-1</sup>                                                                                       | 0.364                                                           | 1.341                                                               | 0.883                                                               | 0.511                                                           | 1.233                                                               |
| independent data                                                                                               | 5228                                                            | 5099                                                                | 4670                                                                | 8537                                                            | 7410                                                                |
| refined parameters                                                                                             | 638                                                             | 365                                                                 | 393                                                                 | 496                                                             | 483                                                                 |
| <i>R</i> <sub>1</sub> <sup>c</sup> , <i>wR</i> <sub>2</sub> <sup>d</sup> ( <i>I</i> > 2 $\sigma$ ( <i>I</i> )) | 0.0624, 0.1640                                                  | 0.0514, 0.0973                                                      | 0.0514, 0.1002                                                      | 0.0403, 0.1022                                                  | 0.0453, 0.1091                                                      |
| <i>R</i> <sub>1</sub> , <i>wR</i> <sub>2</sub> (all data)                                                      | 0.0929, 0.1888                                                  | 0.1007, 0.1174                                                      | 0.0910, 0.1140                                                      | 0.0459, 0.1053                                                  | 0.0573, 0.1166                                                      |

<sup>a</sup>T = 100(2) K, Mo K $\alpha$  radiation ( $\lambda = 0.71073$  Å). <sup>b</sup>T = 15(2) K, synchrotron radiation ( $\lambda = 0.41328$  Å).

<sup>c</sup>*R*<sub>1</sub> =  $\sum||F_o| - |F_c|| / \sum|F_o|$ . <sup>d</sup>*wR*<sub>2</sub> =  $\{\sum[w(F_o^2 - F_c^2)^2 / (F_o^2)^2]\}^{1/2}$ .

**Table S3.** Crystallographic Data<sup>a</sup> for Compounds **19-23**.

| compounds                                                                                                      | [19]·0.5Et <sub>2</sub> O                                             | (Et <sub>4</sub> N)[20]<br>·(HOTf)·DMF                                           | (Me <sub>4</sub> N)[21]                                           | [22] <sup>b</sup>                                                 | [23]·DMF                                                                            |
|----------------------------------------------------------------------------------------------------------------|-----------------------------------------------------------------------|----------------------------------------------------------------------------------|-------------------------------------------------------------------|-------------------------------------------------------------------|-------------------------------------------------------------------------------------|
| formula                                                                                                        | C <sub>35</sub> H <sub>45</sub> ClFeN <sub>7</sub> NiO <sub>3.5</sub> | C <sub>40</sub> H <sub>59</sub> F <sub>3</sub> N <sub>8</sub> NiO <sub>6</sub> S | C <sub>34</sub> H <sub>47</sub> N <sub>7</sub> NiO <sub>3</sub> S | C <sub>30</sub> H <sub>36</sub> N <sub>6</sub> NiO <sub>3</sub> S | C <sub>33</sub> H <sub>41</sub> Cl <sub>2</sub> FeN <sub>7</sub> NiO <sub>3</sub> S |
| <i>M</i>                                                                                                       | 769.79                                                                | 895.72                                                                           | 692.56                                                            | 619.42                                                            | 801.25                                                                              |
| crystal system                                                                                                 | monoclinic                                                            | triclinic                                                                        | Triclinic                                                         | monoclinic                                                        | monoclinic                                                                          |
| space group                                                                                                    | <i>P2(1)/c</i>                                                        | <i>P-1</i>                                                                       | <i>P1</i>                                                         | <i>P2(1)/n</i>                                                    | <i>P2(1)/c</i>                                                                      |
| <i>a</i> , Å                                                                                                   | 11.2981(11)                                                           | 12.4478(19)                                                                      | 8.9626(16)                                                        | 19.5761(5)                                                        | 10.9069(17)                                                                         |
| <i>b</i> , Å                                                                                                   | 15.9375(16)                                                           | 13.120(2)                                                                        | 8.9597(16)                                                        | 7.8176(2)                                                         | 17.413(3)                                                                           |
| <i>c</i> , Å                                                                                                   | 20.206(2)                                                             | 15.302(2)                                                                        | 10.890(2)                                                         | 22.1213(6)                                                        | 18.504(3)                                                                           |
| $\alpha$ , deg                                                                                                 | 90                                                                    | 76.443(2)                                                                        | 99.410(3)                                                         | 90                                                                | 90                                                                                  |
| $\beta$ , deg                                                                                                  | 105.165(2)                                                            | 80.907(2)                                                                        | 99.424(3)                                                         | 108.7690(10)                                                      | 103.226(2)                                                                          |
| $\gamma$ , deg                                                                                                 | 90                                                                    | 61.410(2)                                                                        | 91.889(3)                                                         | 90                                                                | 90                                                                                  |
| <i>V</i> , Å <sup>3</sup>                                                                                      | 3511.6(6)                                                             | 2130.0(6)                                                                        | 849.5(3)                                                          | 3205.38(14)                                                       | 3421.1(9)                                                                           |
| <i>Z</i>                                                                                                       | 4                                                                     | 2                                                                                | 1                                                                 | 4                                                                 | 4                                                                                   |
| $\mu$ , mm <sup>-1</sup>                                                                                       | 1.073                                                                 | 0.573                                                                            | 0.678                                                             | 0.377                                                             | 1.238                                                                               |
| independent data                                                                                               | 8372                                                                  | 8821                                                                             | 5976                                                              | 16952                                                             | 6472                                                                                |
| refined parameters                                                                                             | 461                                                                   | 597                                                                              | 542                                                               | 405                                                               | 469                                                                                 |
| <i>R</i> <sub>1</sub> <sup>c</sup> , <i>wR</i> <sub>2</sub> <sup>d</sup> ( <i>I</i> > 2 $\sigma$ ( <i>I</i> )) | 0.0433, 0.1048                                                        | 0.0646, 0.1780                                                                   | 0.0581, 0.1388                                                    | 0.0678, 0.2069                                                    | 0.0573, 0.1424                                                                      |
| <i>R</i> <sub>1</sub> , <i>wR</i> <sub>2</sub> (all data)                                                      | 0.0565, 0.1143                                                        | 0.0774, 0.1899                                                                   | 0.0669, 0.1454                                                    | 0.1011, 0.2483                                                    | 0.0917, 0.1651                                                                      |

<sup>a</sup>T = 100(2) K, Mo K $\alpha$  radiation ( $\lambda = 0.71073$  Å). <sup>b</sup>T = 95(2) K, synchrotron radiation ( $\lambda = 0.39364$  Å).

<sup>c</sup>*R*<sub>1</sub> =  $\sum||F_o| - |F_c|| / \sum|F_o|$ . <sup>d</sup>*wR*<sub>2</sub> =  $\{\sum[w(F_o^2 - F_c^2)^2 / (F_o^2)^2]\}^{1/2}$ .

**Table S4.** Crystallographic Data<sup>a</sup> for Compounds **24-28**.

| compounds                                                                                                      | [24]·DMSO                                                                              | [25](ClO <sub>4</sub> )·<br>0.5DMF                                               | (Me <sub>4</sub> N)[26]<br>·0.5Et <sub>2</sub> O                  | [27]·ClO <sub>4</sub>                                                   | [28]·ClO <sub>4</sub>                                                   |
|----------------------------------------------------------------------------------------------------------------|----------------------------------------------------------------------------------------|----------------------------------------------------------------------------------|-------------------------------------------------------------------|-------------------------------------------------------------------------|-------------------------------------------------------------------------|
| formula                                                                                                        | C <sub>35</sub> H <sub>40</sub> ClFeN <sub>7</sub> Ni<br>O <sub>3</sub> S <sub>2</sub> | C <sub>31.5</sub> H <sub>38.5</sub> ClCuN <sub>6.5</sub><br>NiO <sub>7.5</sub> S | C <sub>39</sub> H <sub>59</sub> N <sub>8</sub> NiO <sub>3.5</sub> | C <sub>39</sub> H <sub>56</sub> ClCuN <sub>9</sub> Ni<br>O <sub>9</sub> | C <sub>36</sub> H <sub>49</sub> ClCuN <sub>8</sub> Ni<br>O <sub>8</sub> |
| <i>M</i>                                                                                                       | 796.85                                                                                 | 817.95                                                                           | 754.65                                                            | 952.63                                                                  | 879.53                                                                  |
| crystal system                                                                                                 | monoclinic                                                                             | monoclinic                                                                       | monoclinic                                                        | monoclinic                                                              | monoclinic                                                              |
| space group                                                                                                    | <i>P2(1)/n</i>                                                                         | <i>P2(1)/n</i>                                                                   | <i>C2</i>                                                         | <i>P2(1)/n</i>                                                          | <i>P2(1)/c</i>                                                          |
| <i>a</i> , Å                                                                                                   | 14.8812(14)                                                                            | 11.1284(12)                                                                      | 13.1014(8)                                                        | 18.272(2)                                                               | 12.586(4)                                                               |
| <i>b</i> , Å                                                                                                   | 14.8236(14)                                                                            | 19.205(2)                                                                        | 12.8847(8)                                                        | 11.5911(13)                                                             | 12.796(5)                                                               |
| <i>c</i> , Å                                                                                                   | 15.4676(15)                                                                            | 15.8027(16)                                                                      | 23.4563(15)                                                       | 20.991(2)                                                               | 23.054(7)                                                               |
| $\alpha$ , deg                                                                                                 | 90                                                                                     | 90                                                                               | 90                                                                | 90                                                                      | 90                                                                      |
| $\beta$ , deg                                                                                                  | 93.701(2)                                                                              | 94.954(2)                                                                        | 94.8400(10)                                                       | 108.935(2)                                                              | 94.040(6)                                                               |
| $\gamma$ , deg                                                                                                 | 90                                                                                     | 90                                                                               | 90                                                                | 90                                                                      | 90                                                                      |
| <i>V</i> , Å <sup>3</sup>                                                                                      | 3404.9(6)                                                                              | 3364.8(6)                                                                        | 3945.5(4)                                                         | 4205.1(8)                                                               | 3704(2)                                                                 |
| <i>Z</i>                                                                                                       | 4                                                                                      | 4                                                                                | 4                                                                 | 4                                                                       | 4                                                                       |
| $\mu$ , mm <sup>-1</sup>                                                                                       | 1.227                                                                                  | 1.393                                                                            | 0.540                                                             | 1.083                                                                   | 1.219                                                                   |
| independent data                                                                                               | 6949                                                                                   | 6891                                                                             | 8102                                                              | 7945                                                                    | 6924                                                                    |
| refined parameters                                                                                             | 461                                                                                    | 546                                                                              | 653                                                               | 545                                                                     | 496                                                                     |
| <i>R</i> <sub>1</sub> <sup>b</sup> , <i>wR</i> <sub>2</sub> <sup>c</sup> ( <i>I</i> > 2 $\sigma$ ( <i>I</i> )) | 0.0402, 0.0973                                                                         | 0.0502, 0.1158                                                                   | 0.0701, 0.1837                                                    | 0.0605, 0.1399                                                          | 0.0571, 0.1254                                                          |
| <i>R</i> <sub>1</sub> , <i>wR</i> <sub>2</sub> (all data)                                                      | 0.0489, 0.1026                                                                         | 0.0553, 0.1183                                                                   | 0.0882, 0.2033                                                    | 0.1095, 0.1668                                                          | 0.0955, 0.1444                                                          |

<sup>a</sup>T = 100(2) K, Mo K $\alpha$  radiation ( $\lambda = 0.71073$  Å). <sup>b</sup>*R*<sub>1</sub> =  $\sum||F_o| - |F_c|| / \sum|F_o|$ . <sup>c</sup>*wR*<sub>2</sub> =  $\{\sum[w(F_o^2 - F_c^2)^2 / (F_o^2)^2]\}^{1/2}$ .

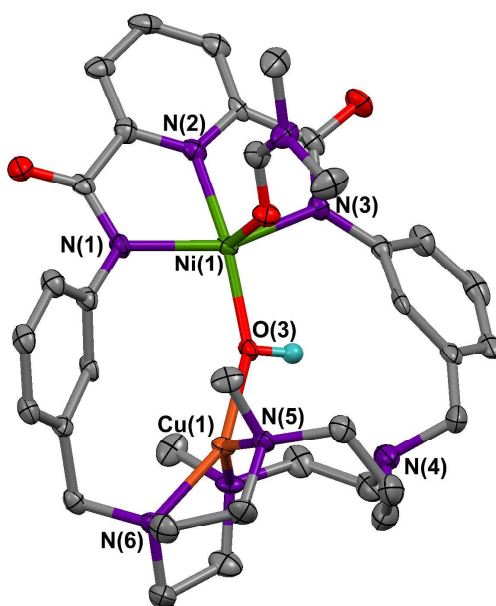

**Figure S1.** Structure of  $(\text{Me}_4\text{N})[\text{Ni}(\mu_2\text{-OH})(\text{DMF})\text{Cu}(\text{⌊-pyN}_2\text{N}_4^{\text{Me}_2})]$  (**28**). Bond lengths (Å): Ni-N(1) 2.080(4), Ni-N(2) 1.993(4), Ni-N(3) 2.141(4), Ni-O(3) 2.008(4), Cu-O(3) 1.936(3), Cu-N(5) 2.074(4), Cu-N(6) 2.068(4), Cu-N(7) 2.086(4), Cu $\cdots$ N(4) 3.129(4), Ni $\cdots$ Cu 3.833 (2).

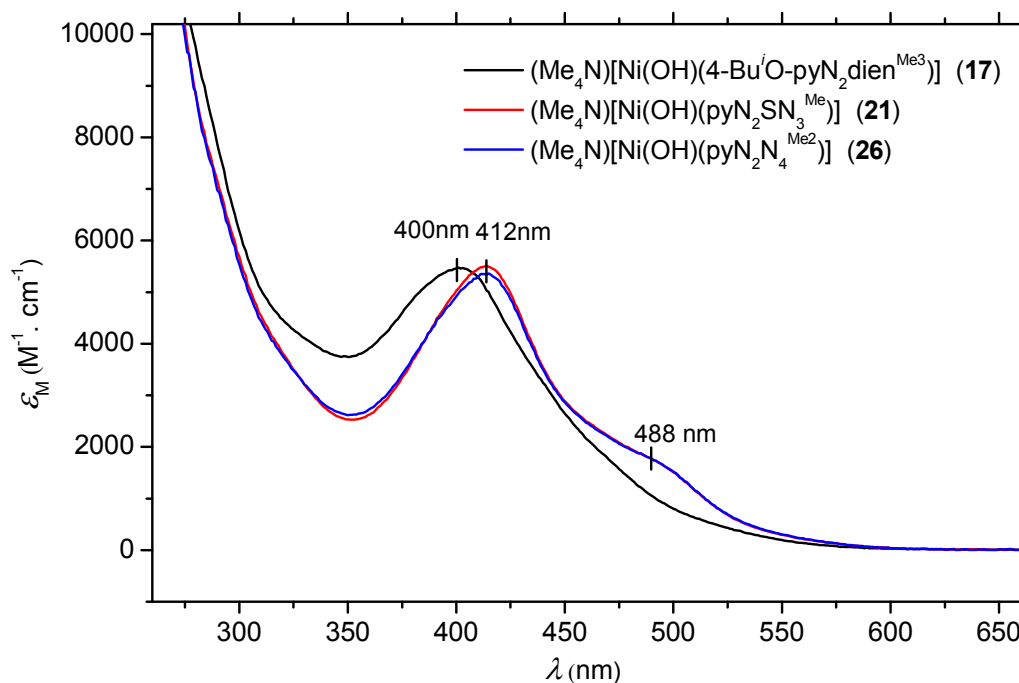

**Figure S2.** Absorption spectra of mononuclear  $[\text{Ni}^{\text{II}}\text{-OH}]$  complexes  $(\text{Me}_4\text{N})[\text{Ni}(\text{OH})(\text{⌊-}22\text{-4-Bu}^i\text{O-pyN}_2\text{dien}^{\text{Me}_3})]$  (**17**),  $(\text{Me}_4\text{N})[\text{Ni}(\text{OH})(\text{⌊-pyN}_2\text{SN}_3^{\text{Me}})]$  (**21**) and  $(\text{Me}_4\text{N})[\text{Ni}(\text{OH})(\text{⌊-pyN}_2\text{N}_4^{\text{Me}_2})]$  (**26**) in DMF at 298 K.
